# Supplementary material for: EBNA1-specific luminescent small molecules for the imaging and inhibition of latent EBV-infected tumor cells
Source: Royal Society of Chemistry journal article supplement (doi:10.1039/c4cc01589d), 2014-01-01
Supplement: c4cc01589d1.pdf [file c4cc01589d1.pdf]

**Supporting Information**  
**for**  
**EBNA1 specific luminescencesmall molecules for imaging**  
**and inhibition of latently EBV-infected tumor cells**

Lijun Jiang,<sup>b</sup> Yin-Lai Lui,<sup>a</sup> Hongguang Li,<sup>b</sup> Chi-Fai Chan,<sup>b</sup> Rongfeng Lan,<sup>c</sup> Wai-Lun Chan,<sup>b</sup> Terrence Chi-Kong Lau,<sup>d</sup> George Sai-Wah Tsao,<sup>e</sup> Nak-Ki Mak<sup>a\*</sup> and Ka-Leung Wong<sup>b\*</sup>

<sup>a</sup>Department of Biology, Hong Kong Baptist University, Kowloon Tong, Hong Kong SAR, Tel: 852-34117059, Email:nkmak@hkbu.edu.hk.

<sup>b</sup>Department of Chemistry, Hong Kong Baptist University, Kowloon Tong, Hong Kong SAR, Tel: 852 34112370, Email:klwong@hkbu.edu.hk.

<sup>c</sup>Hong Kong Baptist University Institute of Research and Continuing Education, Shenzhen, P. R. China;

<sup>d</sup> Department of Biology and Chemistry, City University of Hong Kong, Kowloon Tong, Hong Kong SAR;

<sup>e</sup> Department of Anatomy, The University of Hong Kong, Hong Kong SAR

**Experimental**

1) Synthesis of JLP<sub>1</sub> and JLP<sub>2</sub>

All chemicals used were of reagent-grade and were purchased from Sigma-Aldrich and used without further purification. All analytical-grade solvents were dried by standard procedures, distilled and deaerated before use. NMR spectra were recorded on a Bruker Ultrashield 400 Plus NMR spectrometer. The  $^1\text{H}$  NMR chemical shifts were referenced to tetramethylsilane, TMS ( $\delta = 0.00$ ). High-resolution mass spectra, reported as  $m/z$ , were obtained on a Bruker Autoflex MALDI-TOF mass spectrometer. The synthetic route of intermediates and  $\text{LP}_1$ ,  $\text{LP}_2$  were shown in the figures S1.

**2:** Yield: 96%;  $^1\text{HNMR}$  ( $\text{CDCl}_3$ ):  $\delta$  9.24 (d,  $J = 6.8$  Hz, 2H), 7.87 (d,  $J = 6.4$  Hz, 2H), 4.92 (m, 2H), 2.65 (s, 3H), 1.68 (t,  $J = 7.2$  Hz, 3H);  $^{13}\text{CNMR}$  ( $\text{CDCl}_3$ ):  $\delta$  158.95, 143.67, 128.97, 56.46, 22.37, 17.14;

**4:** Yield: 90%;  $^1\text{HNMR}$  ( $\text{CDCl}_3$ ):  $\delta$  9.88 (s, 1H), 7.83 (d,  $J = 9.2$  Hz, 2H), 6.99 (d,  $J = 8.4$  Hz, 2H), 4.69 (s, 2H), 4.26 (m, 2H), 1.28 (t,  $J = 7.2$  Hz, 3H);  $^{13}\text{CNMR}$  ( $\text{CDCl}_3$ ):  $\delta$  190.92, 168.24, 162.79, 132.15, 130.89, 115.06, 65.37, 61.86, 14.32;

**5:** Yield: 87%;  $^1\text{HNMR}$  ( $\text{MeOD}$ ):  $\delta$  8.76 (d,  $J = 6.8$  Hz, 2H), 8.13 (d,  $J = 6.8$  Hz, 2H), 7.90 (d,  $J = 16.4$  Hz, 1H), 7.72 (d,  $J = 8.8$  Hz, 2H), 7.30 (d,  $J = 16$  Hz, 1H), 7.02 (d,  $J = 8.8$  Hz, 2H);  $^{13}\text{CNMR}$  ( $\text{MeOD}$ ):  $\delta$  178.08, 169.09, 162.74, 153.48, 150.10, 139.55, 138.09, 133.09, 130.75, 124.84, 74.33, 70.40, 64.75, 25.81, 23.68; MALDI-TOF MS: calcd. For  $[\text{M}^+]$ : 312.16, found: 312.16;

**JL:** Yield: 37%;  $^1\text{HNMR}$  (dimethyl sulfoxide –  $d_6$ ):  $\delta$  8.91 (d,  $J = 7.2$  Hz, 2H), 8.18 (d,  $J = 6.8$  Hz, 2H), 7.98 (d,  $J = 16.4$  Hz, 1H), 7.71 (d,  $J = 8.8$  Hz, 2H), 7.38 (d,  $J = 16.4$  Hz, 1H), 7.04 (d,  $J = 8.8$  Hz, 2H), 4.77 (s, 2H), 4.50 (m, 2H), 1.52 (t,  $J = 7.4$  Hz, 3H);  $^{13}\text{CNMR}$  (dimethyl sulfoxide –  $d_6$ ):  $\delta$  169.92, 159.71, 153.15, 143.87, 140.59, 129.92, 128.25, 123.45, 121.01, 115.19, 55.14, 16.19; MALDI-TOF MS: calcd. For  $[\text{M}^+]$ : 284.13, found: 284.17;

**JLP<sub>1</sub>:** MALDI-TOF MS: calcd. For  $[\text{M}^+]$ : 1073.46, found: 1074.92; Elemental Analysis: Calculated C = 66.78, H = 6.64, N = 10.10; Found = C = 66.18, H = 6.32, N = 10.01.

**JLP<sub>2</sub>:** MALDI-TOF MS: calcd. For  $[\text{M}^+]$ : 970.45, found: 971.44; Calculated C = 63.72, H = 6.47, N = 10.43; Found C = 63.66, H = 6.44, N = 10.31.

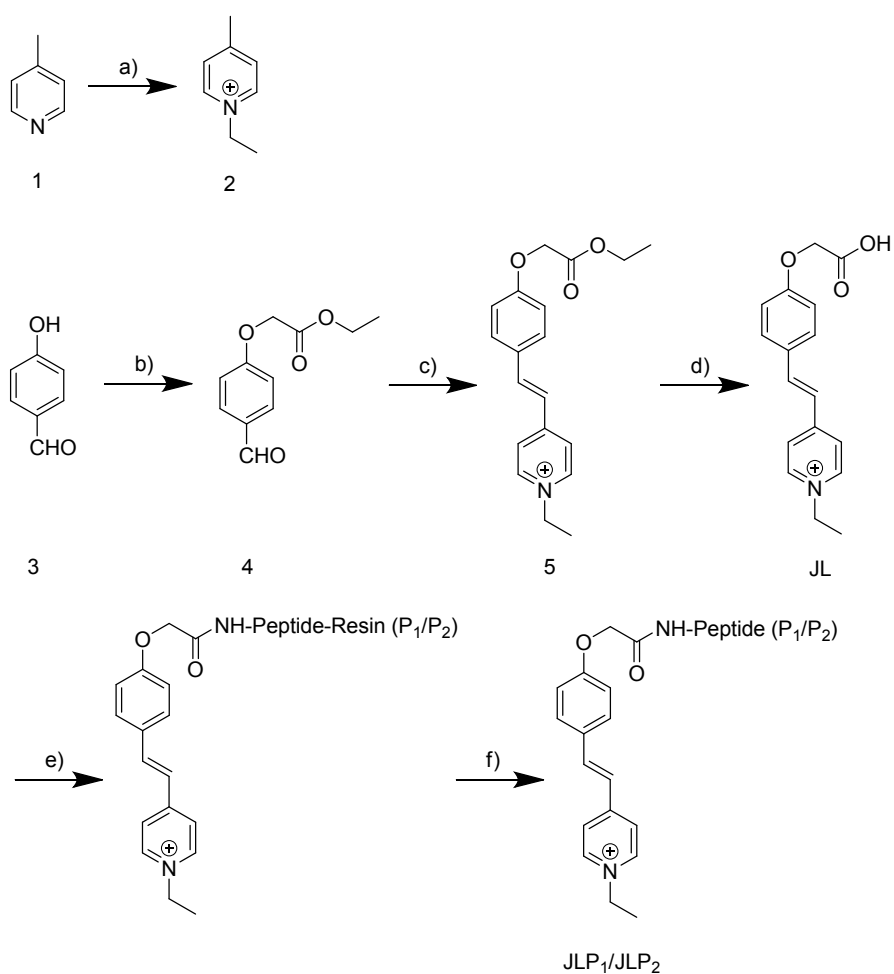

a) CH<sub>3</sub>CH<sub>2</sub>I, ACN, 90 °C, 4h;

b) BrCH<sub>2</sub>COOCH<sub>2</sub>CH<sub>3</sub>, K<sub>2</sub>CO<sub>3</sub>, ACN, reflux, overnight;

c) 2, Piperidine, EtOH, 90 °C, 6h;

d) 0.4 mol/L NaOH, dioxane, rt, 4h;

e) Peptide-Resin, PyBOP, DIPEA, DMF, rt, overnight;

f) TFA/DCM, rt, 3h.

**Figure S1.** The synthetic routes of JL and JLP<sub>1</sub>/JLP<sub>2</sub>

HKBU\_PROTON

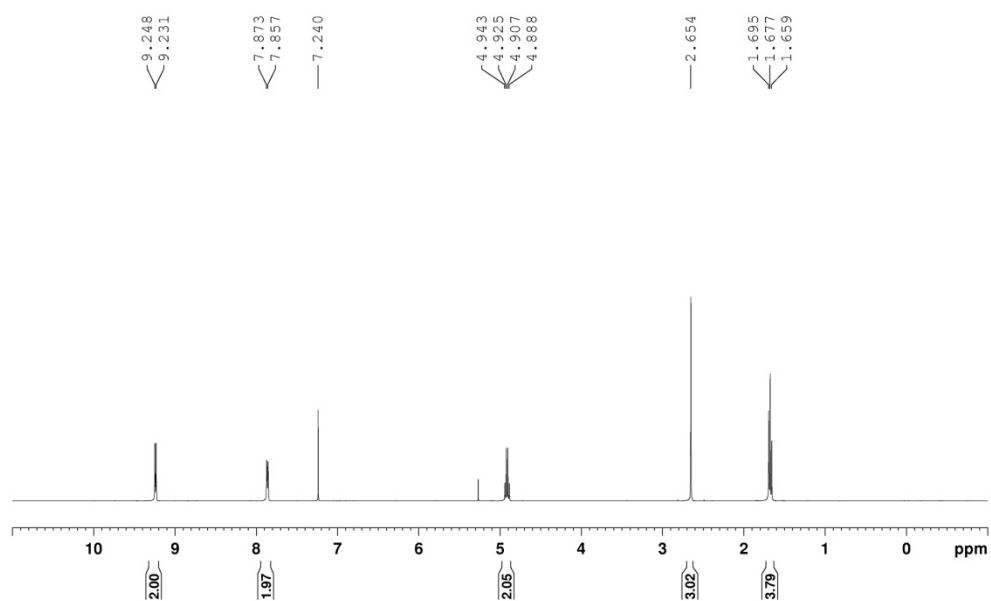

**Figure S2.** 400 MHz- $^1\text{H}$ -NMR ( $\text{CDCl}_3$ ) spectrum of intermediate **2**

HKBU\_CARBON

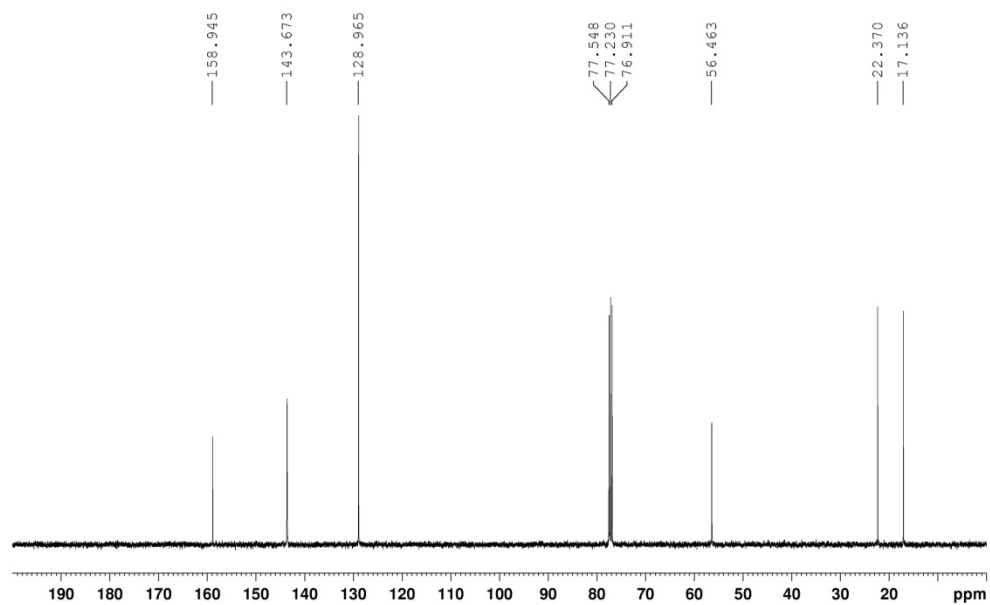

**Figure S3.** 400 MHz- $^{13}\text{C}$ -NMR ( $\text{CDCl}_3$ ) spectrum of intermediate **2**

HKBU\_PROTON

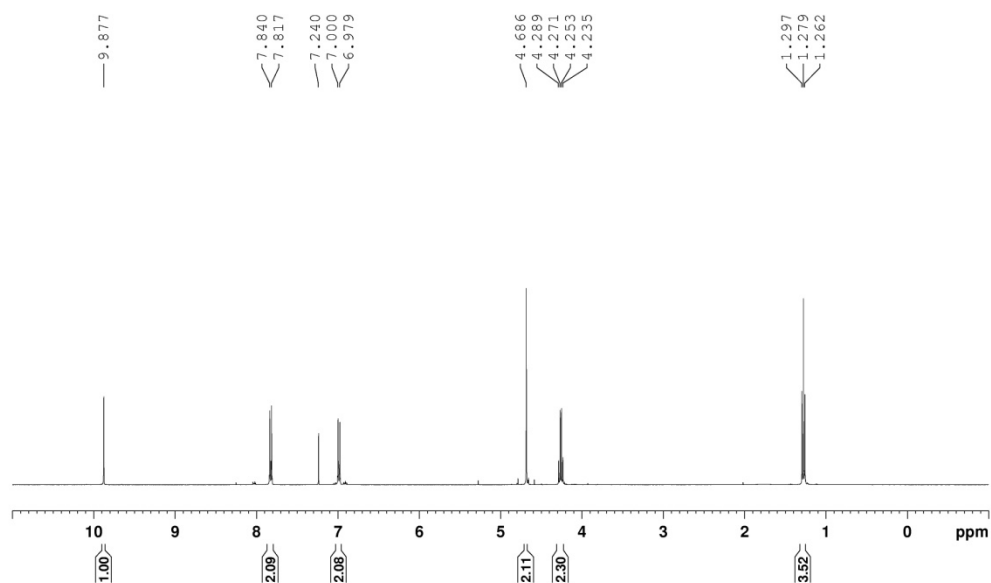

**Figure S4.** 400 MHz- $^1\text{H}$ -NMR ( $\text{CDCl}_3$ ) spectrum of intermediate **4**

HKBU\_CARBON

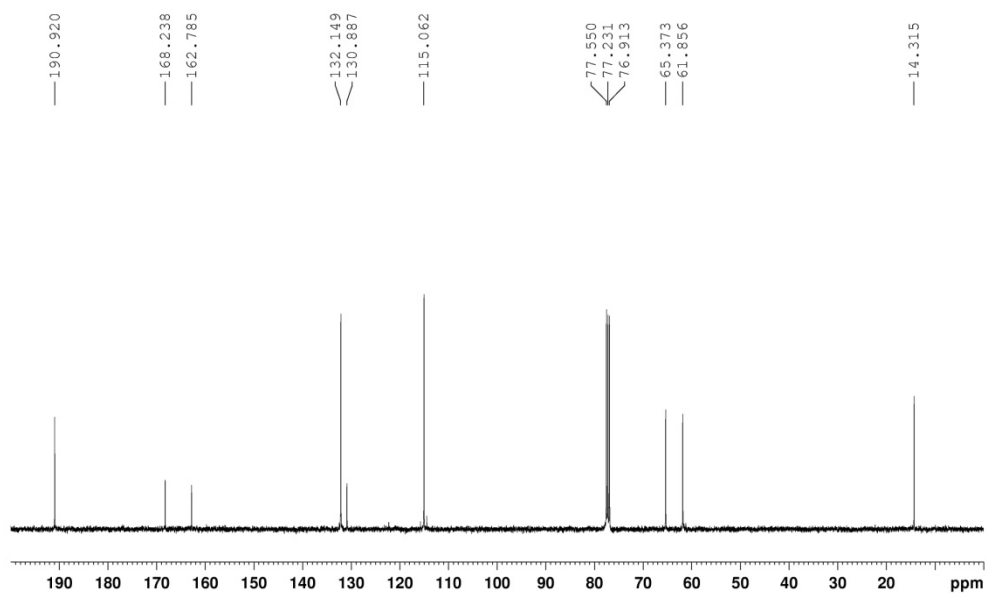

**Figure S5.** 400 MHz- $^{13}\text{C}$ -NMR ( $\text{CDCl}_3$ ) spectrum of intermediate **4**

HKBU\_PROTON

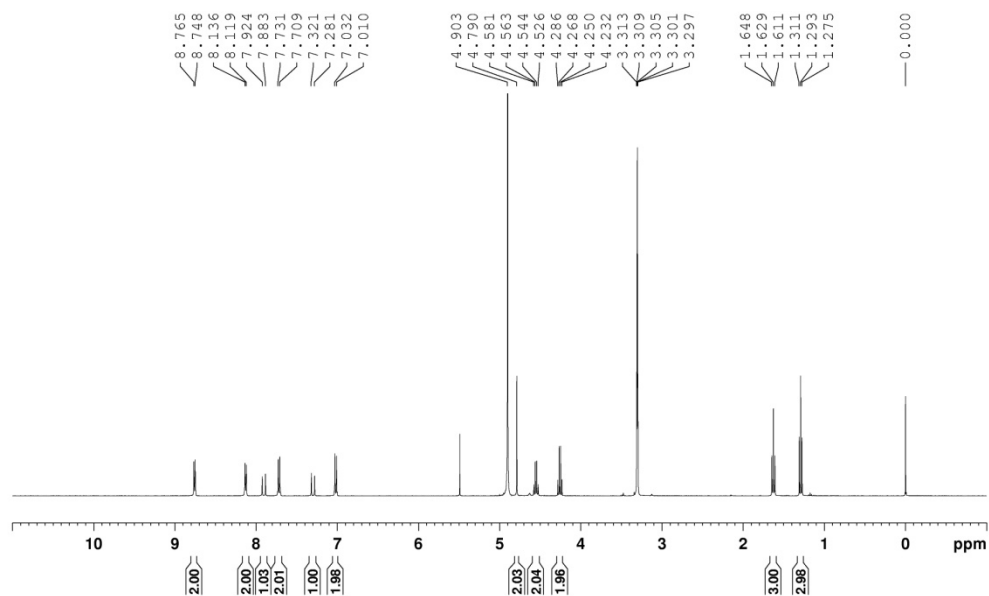

**Figure S6.** 400 MHz- $^1\text{H}$ -NMR (MeOD) spectrum of intermediate **5**

HKBU\_CARBON

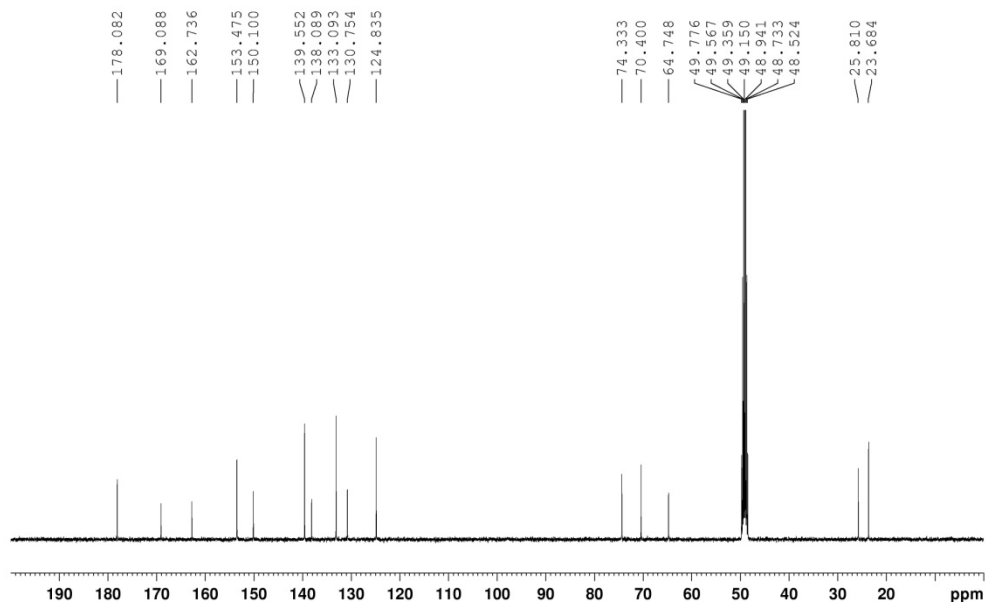

**Figure S7.** 400 MHz- $^{13}\text{C}$ -NMR (MeOD) spectrum of intermediate **5**

Jiang Lijun Gary

**HONG KONG BAPTIST UNIVERSITY, DEPARTMENT OF CHEMISTRY (MALDI-TOF)**

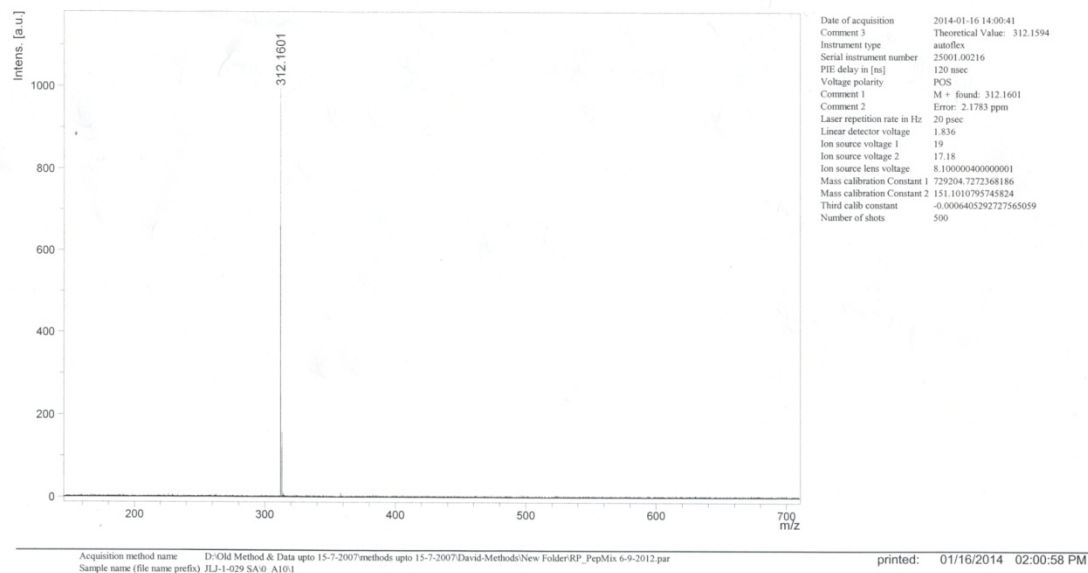

**Figure S8.** MALDI-TOF spectrum of intermediate **5**

HKBU\_PROTON

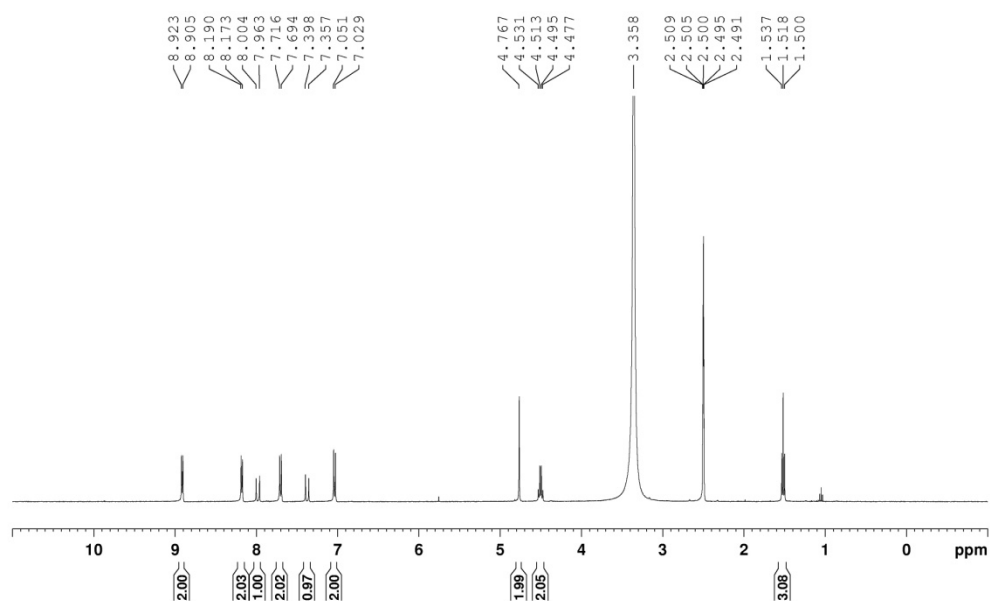

**Figure S9.** 400 MHz-<sup>1</sup>H-NMR (dimethyl sulfoxide-d<sub>6</sub>) spectrum of **JL**

HKBU\_CARBON

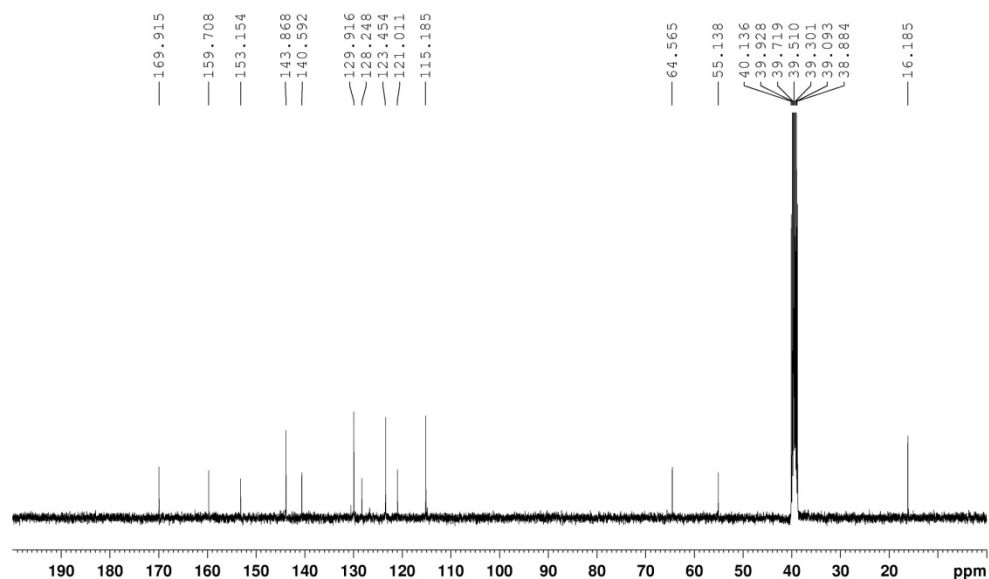

**Figure S10.** 400 MHz- $^{13}\text{C}$ -NMR (dimethyl sulfoxide- $\text{d}_6$ ) spectrum of **JL**

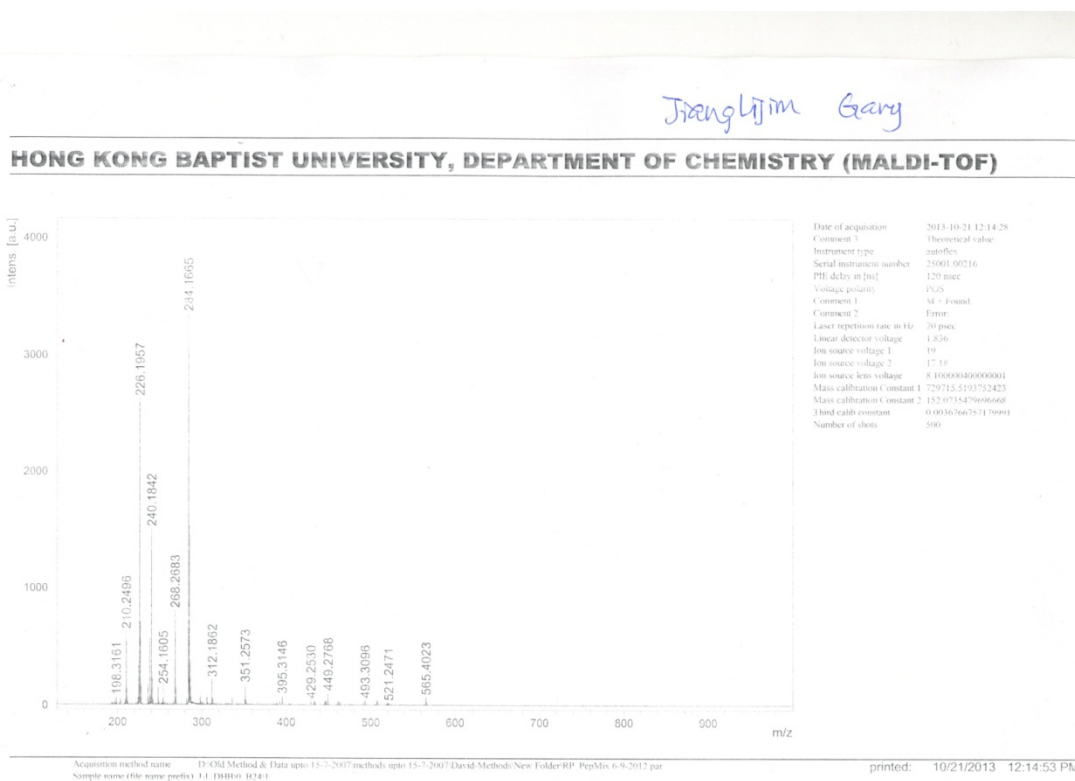

**Figure S11.** MALDI-TOF spectrum of **JL**



*Trang Li Jun Gary*

**HONG KONG BAPTIST UNIVERSITY, DEPARTMENT OF CHEMISTRY (MALDI-TOF)**

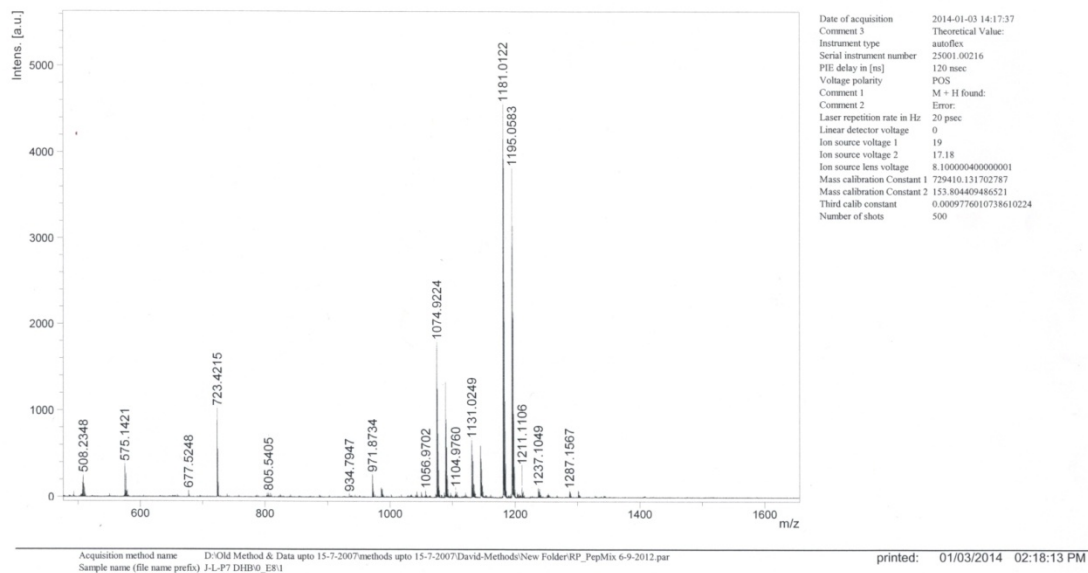

**Figure S12. MALDI-TOF spectrum of JLP<sub>1</sub>**

*Trang Li Jun Gary*

**HONG KONG BAPTIST UNIVERSITY, DEPARTMENT OF CHEMISTRY (MALDI-TOF)**

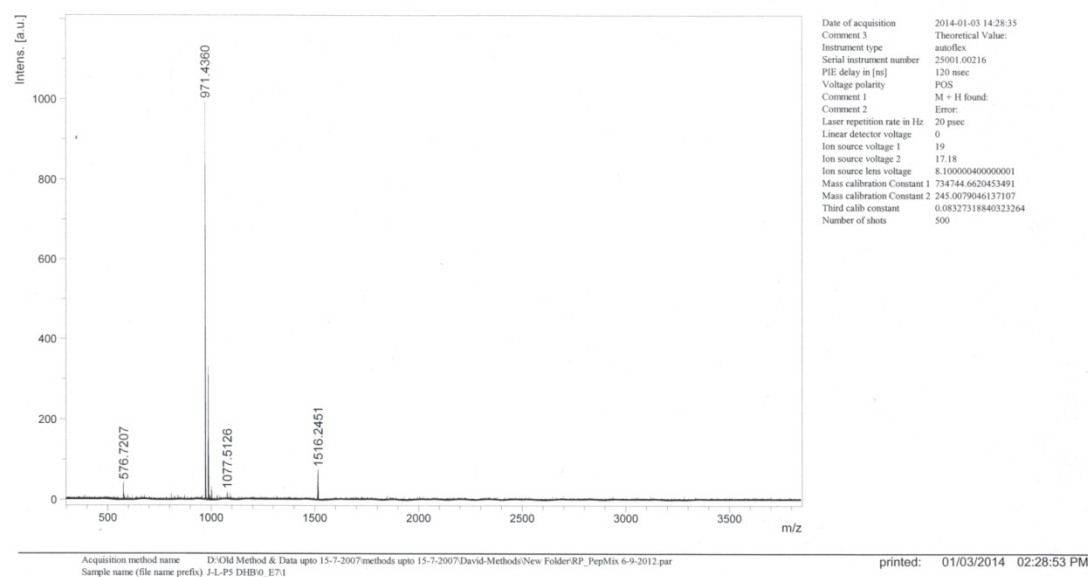

**Figure S13. MALDI-TOF spectrum of JLP<sub>2</sub>**

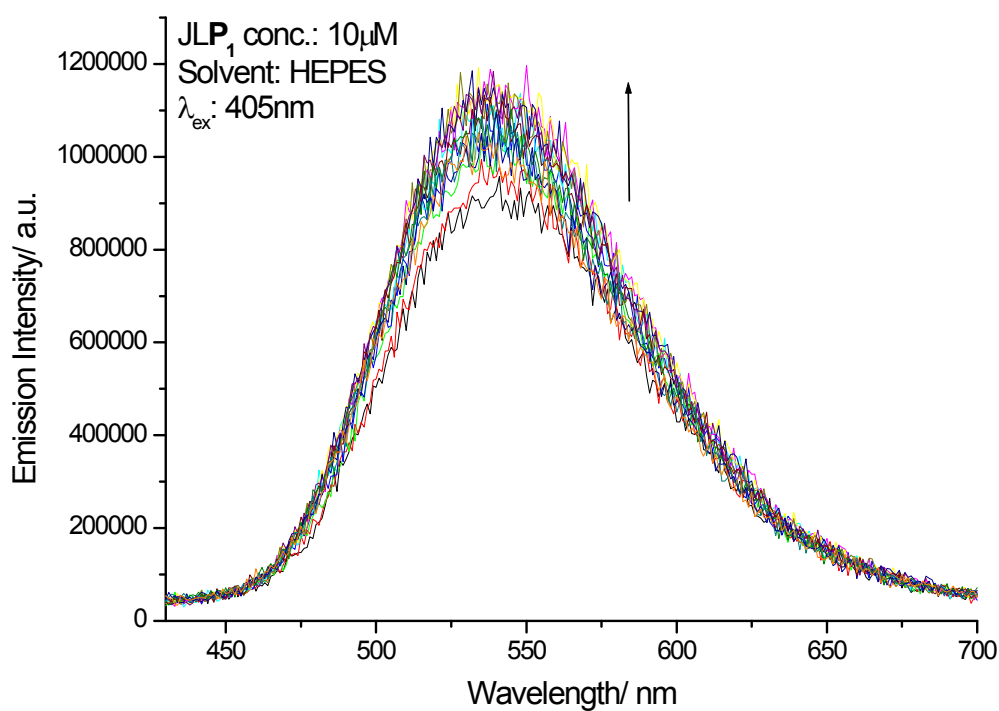

**Figure S14.** The emission titration of JLP<sub>1</sub> upon the addition of the 200 nM EBNA1.

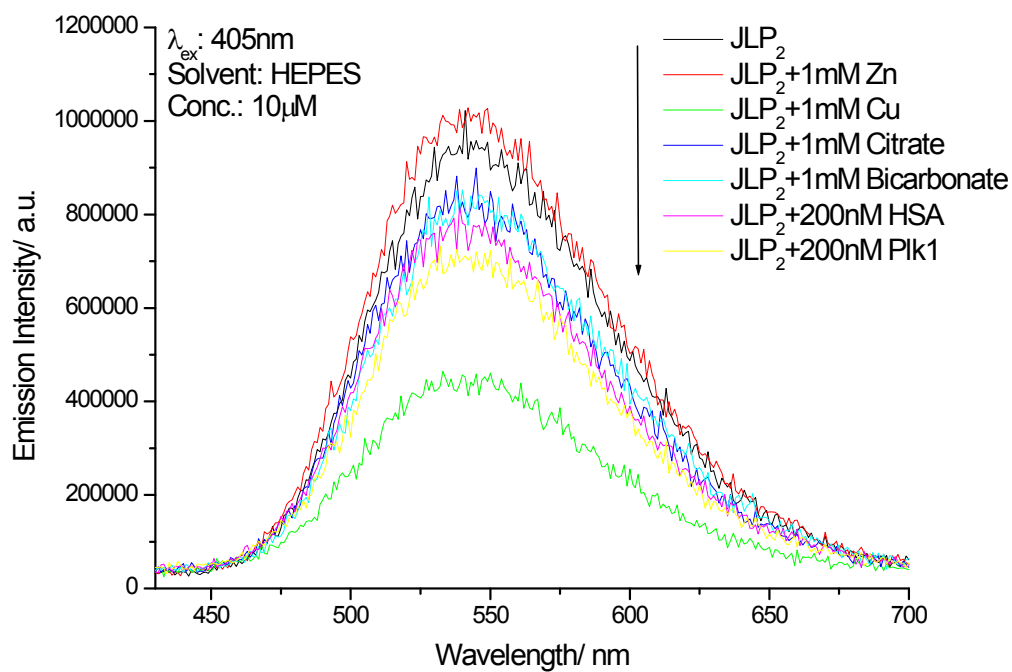

**Figure S15.** The emission spectra of JLP<sub>2</sub> upon the addition of the various protein and small molecules.
